# Supplementary material
Source: MDPI journal article supplement (https://www.mdpi.com/2073-4441/14/12/1975)
Supplement: s1 [file s1]

**Table S1.** Characteristics of the water bodies in the study

| Water bodies   | Sign | Type stations | Coordinate |         | Characteristics                                                                                                                          |
|----------------|------|---------------|------------|---------|------------------------------------------------------------------------------------------------------------------------------------------|
|                |      |               | X          | Y       |                                                                                                                                          |
| Tien river     | N1   | Base line     | 552211     | 1194912 | Water quality control of Tien River.                                                                                                     |
|                | N2   | Base line     | 564988     | 1185446 | Controlling water quality of Tien river, at the confluence between Cai Vung and Tien rivers.                                             |
|                | N3   | Base line     | 567312     | 1169499 | Controlling water quality of Tien river, at the confluence between Vam Nao and Tien rivers.                                              |
|                | N4   | Base line     | 575663     | 1167064 | Controlling the water quality of Tien River, the confluence between the two branches of the Tien River and the beginning of Gieng Islet. |
|                | N5   | Base line     | 589784     | 1153830 | Controlling water quality at the end of the Tien River in the province before flowing through Dong Thap.                                 |
|                | DT1  | Impact        | 554699     | 1194414 | Monitoring the impact of wastewater in Tan Chau urban area.                                                                              |
|                | DT2  | Impact        | 571273     | 1166986 | Monitoring the impact of wastewater in the Cho Moi urban area.                                                                           |
|                | DT3  | Impact        | 581029     | 1162307 | Monitoring the impact of wastewater in My Luong urban area                                                                               |
|                | TS1  | Impact        | 559880     | 1188560 | Monitoring the impact of aquaculture activities on the Tien River.                                                                       |
|                | TS2  | Impact        | 570753     | 1168426 | Monitoring the impact of aquaculture activities on the Tien River.                                                                       |
|                | TS3  | Impact        | 584521     | 1157065 | Monitoring the impact of aquaculture activities on the Tien River.                                                                       |
|                | TS4  | Impact        | 548134     | 1201285 | Monitoring the impact of aquaculture activities on the Tien River.                                                                       |
| Hau river      | N6   | Base line     | 540670     | 1184515 | Controlling water quality of Hau river, the confluence between Hau river and Chau Doc river.                                             |
|                | N7   | Base line     | 550449     | 1174732 | Controlling the water quality of Hau River.                                                                                              |
|                | N8   | Base line     | 562947     | 1165749 | Controlling water quality of Hau river, the confluence between Vam Nao and Hau rivers.                                                   |
|                | DT4  | Impact        | 576273     | 1147845 | Monitoring the impact of wastewater in the urban area of Long Xuyen City.                                                                |
|                | DT5  | Impact        | 553659     | 1168368 | Monitoring the impact of wastewater in Cai Dau urban area.                                                                               |
|                | CN1  | Impact        | 554720     | 1168808 | Monitoring the impact of wastewater in Binh Long industrial area.                                                                        |
|                | CN2  | Impact        | 577294     | 1146119 | Monitoring the impact of wastewater in My Qui industrial area.                                                                           |
|                | TS5  | Impact        | 540708     | 1184988 | Monitoring the impact of aquaculture activities on the Hau River.                                                                        |
|                | TS6  | Impact        | 567496     | 1156042 | Monitoring the impact of aquaculture activities on the Hau River.                                                                        |
|                | TS7  | Impact        | 576840     | 1153173 | Monitoring the impact of aquaculture activities on the Hau River.                                                                        |
|                | TS8  | Impact        | 576289     | 1151944 | Monitoring the impact of aquaculture activities on the Hau River.                                                                        |
|                | TS9  | Impact        | 552578     | 1171504 | Monitoring the impact of aquaculture activities on the Hau River.                                                                        |
| Phu Hoi river  | N9   | Base line     | 531256     | 1205019 | Control the quality of water from Cambodia entering the Phu Hoi River before entering the Chau Doc River.                                |
| Chau Doc river | N10  | Base line     | 534292     | 1194004 | Control the quality of water from Cambodia entering Chau Doc River before entering Hau River.                                            |
|                | TS10 | Impact        | 540104     | 1184937 | Monitoring the impact of aquaculture activities on Chau Doc river                                                                        |
| Vinh Te canal  | N11  | Base line     | 539213     | 1185061 | Controlling inlet water quality of Vinh Te canal                                                                                         |
|                | N12  | Base line     | 528668     | 1178628 | Monitoring water quality inlet Tra Su canal, impact between Tra Su canal and Vinh Te canal                                               |

| Water bodies              | Sign | Type stations | Coordinate |         | Characteristics                                                                                       |
|---------------------------|------|---------------|------------|---------|-------------------------------------------------------------------------------------------------------|
|                           |      |               | X          | Y       |                                                                                                       |
|                           | N13  | Base line     | 520940     | 1172766 | Controlling water quality on Vinh Te canal.                                                           |
|                           | N14  | Base line     | 503347     | 1161809 | Monitoring water quality at the end of Vinh Te canal in the province, before pouring into Kien Giang. |
| Xang Vinh Tre canal       | N15  | Base line     | 550225     | 1174314 | Monitoring water quality inlet Xang Vinh Tre canal.                                                   |
|                           | N16  | Base line     | 537950     | 1159865 | Monitoring water quality in the middle of Xang Vinh Tre canal.                                        |
|                           | N17  | Base line     | 531393     | 1144610 | Monitoring water quality at the end of Xang Vinh Tre canal                                            |
|                           | TS11 | Impact        | 548722     | 1172710 | Monitoring the impact of aquaculture activities on Xang Vinh Tre canal.                               |
|                           | TS12 | Impact        | 546162     | 1169627 | Monitoring the impact of aquaculture activities on Hao De Lon canal and Xang Vinh Tre canal.          |
| Mac Can Dung canal        | N18  | Base line     | 559084     | 1156769 | Monitoring water quality at the beginning of the Mac Can Dung canal.                                  |
|                           | N19  | Base line     | 545651     | 1154767 | Monitoring water quality in the middle of the Mac Can Dung canal.                                     |
|                           | TS13 | Impact        | 548706     | 1158636 | Monitoring the impact of aquaculture activities on canal 13 and Xang Cay Duong canal.                 |
| Tam Ngan canal            | N20  | Base line     | 527109     | 1153571 | Monitoring the quality of input water in Tam Ngan canal.                                              |
|                           | N21  | Base line     | 517292     | 1151708 | Monitoring water quality in the middle of Tam Ngan canal.                                             |
|                           | N22  | Base line     | 512407     | 1145192 | Monitoring water quality at the end of Tam Ngan canal.                                                |
| Rach Gia-Long Xuyen canal | N23  | Base line     | 574103     | 1149148 | Monitoring the quality of input water in Rach Gia - Long Xuyen canal                                  |
|                           | N24  | Base line     | 561676     | 1145018 | Monitoring water quality between Rach Gia - Long Xuyen canal                                          |
|                           | N25  | Base line     | 549764     | 1126205 | Monitoring water quality at the end of Rach Gia - Long Xuyen canal                                    |
| Ong Chuong canal          | N26  | Base line     | 570173     | 1166771 | Controlling the quality of input water in Ong Chuong canal                                            |
|                           | N27  | Base line     | 577475     | 1159423 | Water quality control between Ong Chuong canal.                                                       |
|                           | N28  | Base line     | 575835     | 1155311 | Controlling water quality at the end of Ong Chuong canal into Hau river.                              |
| 7 canal                   | N29  | Base line     | 544256     | 1197582 | Controlling water quality in canal 7                                                                  |
| Xang canal                | N30  | Base line     | 544796     | 1192396 | Controlling water quality of Xang canal                                                               |
| Muong Khai canal          | N31  | Base line     | 555256     | 1171914 | Water quality control of Muong Khai canal                                                             |
| Xang Ca Mau canal         | N32  | Base line     | 571688     | 1160927 | Controlling water quality between Xang Ca Mau canal                                                   |
| Xang A-B canal            | N33  | Base line     | 581055     | 1156386 | Water quality control of Xang A-B canal                                                               |
| Cong Dong canal           | DT6  | Impact        | 556890     | 1135692 | Monitoring the impact of urban wastewater on Cong Dong canal                                          |
| Tri Ton canal             | DT7  | Impact        | 527588     | 1152631 | Monitoring the impact of urban wastewater on Tri Ton canal                                            |
| Thay Ban canal            | DT8  | Impact        | 536805     | 1196295 | Monitoring the impact of urban wastewater on Thay Ban canal.                                          |
| Huynh Van Thu canal       | DT9  | Impact        | 540636     | 1181296 | Monitoring the impact of urban wastewater on Huynh Van Thu canal.                                     |
| Hau canal                 | CN3  | Impact        | 564144     | 1156496 | Monitoring the impact of wastewater in Binh Hoa industrial area                                       |
| Than Nong canal           | KS1  | Impact        | 549706     | 1191018 | Monitoring the water quality of Than Nong canal, the flank canal of Bac Vam Nao area                  |
|                           | KS2  | Impact        | 557041     | 1177484 | Monitoring the water quality of Than Nong canal, the flank canal of Bac Vam Nao area                  |
|                           | KS3  | Impact        | 561014     | 1171435 | Monitoring the water quality of Than Nong canal, the flank canal of Bac Vam Nao area                  |

| Water bodies              | Sign | Type stations | Coordinate |         | Characteristics                                                                      |
|---------------------------|------|---------------|------------|---------|--------------------------------------------------------------------------------------|
|                           |      |               | X          | Y       |                                                                                      |
|                           | KS4  | Impact        | 554529     | 1181170 | Monitoring the water quality of Than Nong canal, the flank canal of Bac Vam Nao area |
| 26 canal                  | KS5  | Impact        | 564339     | 1182671 | Monitoring water quality in K26 canal                                                |
| Cai Tac canal             | KS6  | Impact        | 560766     | 1171443 | Control inside and outside the flood control area of Bac Vam Nao.                    |
| Phu Binh-Hiep Xuong canal | KS7  | Impact        | 551140     | 1175051 | Water quality monitoring in Phu Binh – Hiep Xuong canal.                             |
| Don Dong canal            | TS14 | Impact        | 574103     | 1139929 | Monitoring the impact of aquaculture activities on Don Dong canal.                   |
|                           | TS15 | Impact        | 570916     | 1138524 | Monitoring the impact of aquaculture activities on Don Dong canal.                   |
|                           | TS16 | Impact        | 572673     | 1139250 | Monitoring the impact of aquaculture activities on Don Dong canal.                   |
|                           | TS17 | Impact        | 565734     | 1136318 | Monitoring the impact of aquaculture activities on Don Dong canal.                   |
| Xa Doi canal              | TS18 | Impact        | 569697     | 1142640 | Monitoring the impact of aquaculture activities on Xa Doi canal.                     |
| Tra Cu caanal             | TS19 | Impact        | 552267     | 1153651 | Monitoring the impact of aquaculture activities on Tra Cu canal.                     |
| Nui Cam mountain          | DL1  | Impact        | 526065     | 1161496 | Monitoring the impact of wastewater in the tourist area.                             |
| Tra Su forest             | DL2  | Impact        | 533160     | 1169076 | Controlling water quality when supplying to Melaleuca forest                         |
